# Supplementary material for: Predicting Brain Age and Gender from Brain Volume Data Using Variational Quantum Circuits
Source: MDPI journal article supplement (doi:10.3390/brainsci14040401), 2024-04-19
Supplement: s1 [file s1]

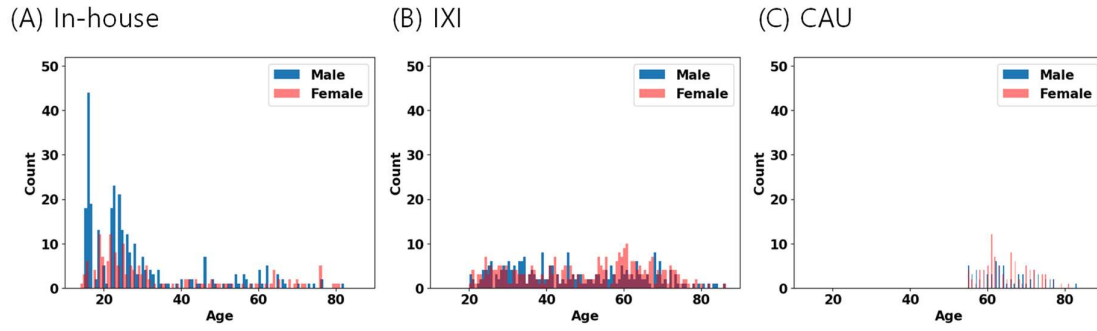

**Figure S1.** Age and sex distributions across each dataset. (A) in-house collected dataset. (B) IXI dataset. (C) CAU dataset.

**Table S1.** Demographics of in-house collected dataset.

| Age range | No. of subjects |        |       |
|-----------|-----------------|--------|-------|
|           | Male            | Female | Total |
| 14-19     | 96              | 26     | 122   |
| 20-29     | 114             | 65     | 179   |
| 30-39     | 26              | 15     | 41    |
| 40-49     | 18              | 12     | 30    |
| 50-59     | 13              | 7      | 20    |
| 60-69     | 16              | 12     | 28    |
| 70-79     | 5               | 10     | 15    |
| 80-89     | 1               | 2      | 3     |
| Total     | 289             | 149    | 438   |

**Table S2.** Demographics of IXI dataset.

| Age range | No. of subjects |        |       |
|-----------|-----------------|--------|-------|
|           | Male            | Female | Total |
| 14-19     | 0               | 1      | 1     |
| 20-29     | 45              | 55     | 100   |
| 30-39     | 60              | 39     | 99    |
| 40-49     | 41              | 48     | 89    |
| 50-59     | 38              | 61     | 99    |
| 60-69     | 47              | 71     | 118   |
| 70-79     | 15              | 34     | 49    |
| 80-89     | 5               | 3      | 8     |
| Total     | 251             | 312    | 563   |

**Table S3.** Demographics of CAU dataset.

| Age range | No. of subjects |        |       |
|-----------|-----------------|--------|-------|
|           | Male            | Female | Total |
| 14-19     | 0               | 0      | 0     |
| 20-29     | 0               | 0      | 0     |
| 30-39     | 0               | 0      | 0     |
| 40-49     | 0               | 0      | 0     |
| 50-59     | 18              | 15     | 33    |
| 60-69     | 32              | 51     | 83    |
| 70-79     | 16              | 22     | 38    |
| 80-89     | 1               | 1      | 2     |
| Total     | 67              | 89     | 156   |

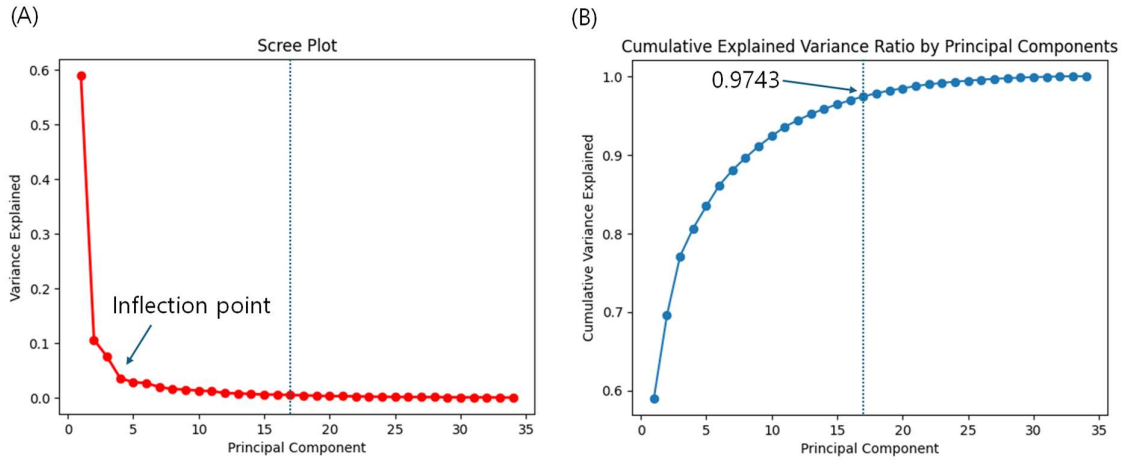**Figure S2.** The scree plot (A) and the cumulative explained variance ratio (B) by the number of principal components.**Table S4.** Age prediction performance of various machine learning regressors.

| Regressors | Train (N=694) |        |       |                | Test (N=173) |        |       |                |
|------------|---------------|--------|-------|----------------|--------------|--------|-------|----------------|
|            | MAE           | MSE    | RMSE  | R <sup>2</sup> | MAE          | MSE    | RMSE  | R <sup>2</sup> |
| LR         | 6.941         | 76.521 | 8.748 | 0.795          | 6.137        | 61.021 | 7.812 | 0.841          |
| BR         | 6.951         | 76.566 | 8.750 | 0.795          | 6.143        | 61.425 | 7.837 | 0.840          |
| XGBoost    | 4.188         | 28.302 | 5.320 | 0.924          | 6.305        | 63.321 | 7.957 | 0.835          |
| RF         | 2.974         | 14.917 | 3.862 | 0.960          | 6.382        | 78.092 | 8.837 | 0.796          |
| SVR        | 5.288         | 40.909 | 6.396 | 0.890          | 6.307        | 64.628 | 8.039 | 0.831          |
| MLP        | 5.958         | 60.272 | 7.763 | 0.839          | 5.293        | 50.448 | 7.103 | 0.868          |
| VQC        | 6.029         | 63.401 | 7.963 | 0.830          | 5.891        | 61.019 | 7.811 | 0.841          |

LR: linear regression, BR: Bayesian ridge, XGBoost: eXtreme gradient boosting, RF: randomforest, SVR: support vector regression, MLP: multi-layer perceptron, VQC: variational quantum circuit.

**Table S5.** Age prediction performance of various machine learning regressors.

| Regressors | Train (N=462) |        |       |                | Test (N=115) |        |       |                |
|------------|---------------|--------|-------|----------------|--------------|--------|-------|----------------|
|            | MAE           | MSE    | RMSE  | R <sup>2</sup> | MAE          | MSE    | RMSE  | R <sup>2</sup> |
| LR         | 6.884         | 75.517 | 8.690 | 0.795          | 6.229        | 62.633 | 7.914 | 0.842          |
| BR         | 6.884         | 75.622 | 8.696 | 0.794          | 6.217        | 61.887 | 7.867 | 0.844          |
| XGBoost    | 3.403         | 19.670 | 4.435 | 0.946          | 6.793        | 78.974 | 8.887 | 0.800          |
| RF         | 3.038         | 16.506 | 4.063 | 0.955          | 7.348        | 87.258 | 9.341 | 0.780          |
| SVR        | 5.243         | 40.672 | 6.377 | 0.889          | 6.539        | 67.969 | 8.244 | 0.828          |
| MLP        | 5.717         | 57.861 | 7.607 | 0.843          | 5.600        | 58.000 | 7.616 | 0.853          |
| VQC        | 6.029         | 60.127 | 7.754 | 0.836          | 5.502        | 56.829 | 7.539 | 0.856          |

LR: linear regression, BR: Bayesian ridge, XGBoost: eXtreme gradient boosting, RF: randomforest, SVR: support vector regression, MLP: multi-layer perceptron, VQC: variational quantum circuit.

**Table S6.** Age prediction performance of various machine learning regressors.

| Regressors | Train (N=231) |        |       |                | Test (N=57) |        |       |                |
|------------|---------------|--------|-------|----------------|-------------|--------|-------|----------------|
|            | MAE           | MSE    | RMSE  | R <sup>2</sup> | MAE         | MSE    | RMSE  | R <sup>2</sup> |
| LR         | 6.773         | 71.010 | 8.427 | 0.826          | 6.228       | 61.251 | 7.826 | 0.848          |
| BR         | 6.809         | 71.372 | 8.448 | 0.825          | 6.158       | 59.592 | 7.720 | 0.852          |
| XGBoost    | 1.863         | 5.781  | 2.404 | 0.986          | 6.513       | 71.529 | 8.457 | 0.823          |
| RF         | 3.294         | 18.472 | 4.298 | 0.955          | 7.439       | 92.641 | 9.625 | 0.770          |
| SVR        | 5.427         | 37.784 | 6.147 | 0.907          | 6.192       | 63.877 | 7.992 | 0.842          |
| MLP        | 6.132         | 58.818 | 7.669 | 0.856          | 6.676       | 64.565 | 8.035 | 0.840          |
| VQC        | 5.439         | 50.765 | 7.125 | 0.876          | 5.171       | 49.714 | 7.051 | 0.877          |

LR: linear regression, BR: Bayesian ridge, XGBoost: eXtreme gradient boosting, RF: randomforest, SVR: support vector regression, MLP: multi-layer perceptron, VQC: variational quantum circuit.

**Table S7.** Age prediction performance of various machine learning regressors.

| Regressors | Train (N=115) |        |       |                | Test (N=28) |         |        |                |
|------------|---------------|--------|-------|----------------|-------------|---------|--------|----------------|
|            | MAE           | MSE    | RMSE  | R <sup>2</sup> | MAE         | MSE     | RMSE   | R <sup>2</sup> |
| LR         | 6.268         | 64.375 | 8.023 | 0.846          | 8.391       | 122.784 | 11.081 | 0.714          |
| BR         | 6.306         | 65.874 | 8.116 | 0.843          | 8.375       | 119.549 | 10.934 | 0.721          |
| XGBoost    | 0.794         | 0.926  | 0.962 | 0.998          | 6.890       | 73.675  | 8.583  | 0.828          |
| RF         | 3.364         | 19.405 | 4.405 | 0.954          | 6.452       | 65.773  | 8.110  | 0.847          |
| SVR        | 5.189         | 34.957 | 5.912 | 0.917          | 6.822       | 69.910  | 8.361  | 0.837          |
| MLP        | 3.951         | 28.450 | 5.334 | 0.932          | 6.692       | 74.150  | 8.611  | 0.827          |
| VQC        | 7.599         | 90.988 | 9.539 | 0.783          | 7.024       | 84.606  | 9.198  | 0.803          |

LR: linear regression, BR: Bayesian ridge, XGBoost: eXtreme gradient boosting, RF: randomforest, SVR: support vector regression, MLP: multi-layer perceptron, VQC: variational quantum circuit.

**Table S8.** Age prediction performance of various machine learning regressors.

| Regressors | Train (N=57) |        |       |                | Test (N=14) |         |        |                |
|------------|--------------|--------|-------|----------------|-------------|---------|--------|----------------|
|            | MAE          | MSE    | RMSE  | R <sup>2</sup> | MAE         | MSE     | RMSE   | R <sup>2</sup> |
| LR         | 5.201        | 37.476 | 6.122 | 0.899          | 6.948       | 81.119  | 9.007  | 0.737          |
| BR         | 5.481        | 40.620 | 6.373 | 0.891          | 6.665       | 81.408  | 9.023  | 0.736          |
| XGBoost    | 0.127        | 0.026  | 0.160 | 1.000          | 7.564       | 119.670 | 10.939 | 0.612          |
| RF         | 2.896        | 12.777 | 3.574 | 0.966          | 7.938       | 125.458 | 11.201 | 0.593          |
| SVR        | 5.419        | 34.399 | 5.865 | 0.908          | 8.283       | 94.746  | 9.734  | 0.693          |
| MLP        | 5.411        | 53.057 | 7.284 | 0.857          | 5.914       | 73.814  | 8.591  | 0.761          |
| VQC        | 7.026        | 82.466 | 9.081 | 0.779          | 7.875       | 110.248 | 10.500 | 0.643          |

LR: linear regression, BR: Bayesian ridge, XGBoost: eXtreme gradient boosting, RF: randomforest, SVR: support vector regression, MLP: multi-layer perceptron, VQC: variational quantum circuit.

**Table S9.** Gender prediction performance of various machine learning classifiers.

| Classifiers | Train (N=694) |           |        |          | Test (N=173) |           |        |          |
|-------------|---------------|-----------|--------|----------|--------------|-----------|--------|----------|
|             | Accuracy      | Precision | Recall | F1-score | Accuracy     | Precision | Recall | F1-score |
| LR          | 0.814         | 0.818     | 0.825  | 0.821    | 0.792        | 0.833     | 0.781  | 0.806    |
| KNN         | 0.826         | 0.809     | 0.849  | 0.829    | 0.763        | 0.767     | 0.775  | 0.771    |
| XGBoost     | 0.999         | 1.000     | 0.997  | 0.999    | 0.769        | 0.778     | 0.778  | 0.778    |
| RF          | 0.999         | 0.997     | 1.000  | 0.999    | 0.769        | 0.789     | 0.772  | 0.780    |
| SVC         | 0.826         | 0.840     | 0.826  | 0.833    | 0.815        | 0.844     | 0.809  | 0.826    |
| MLP         | 0.843         | 0.815     | 0.875  | 0.844    | 0.775        | 0.778     | 0.787  | 0.782    |
| VQC         | 0.811         | 0.831     | 0.811  | 0.821    | 0.809        | 0.867     | 0.788  | 0.825    |

LR: losgistic regression, KNN: k-nearest neighbor, XGBoost: eXtreame gradient boosting, RF: randomforest, SVC: support vector classifier, MLP: multi-layer perceptron, VQC: variational quantum circuit.

**Table S10.** Gender prediction performance of various machine learning classifiers.

| Classifiers | Train (N=462) |           |        |          | Test (N=115) |           |        |          |
|-------------|---------------|-----------|--------|----------|--------------|-----------|--------|----------|
|             | Accuracy      | Precision | Recall | F1-score | Accuracy     | Precision | Recall | F1-score |
| LR          | 0.807         | 0.803     | 0.806  | 0.804    | 0.817        | 0.742     | 0.925  | 0.824    |
| KNN         | 0.823         | 0.816     | 0.823  | 0.816    | 0.774        | 0.758     | 0.833  | 0.794    |
| XGBoost     | 0.988         | 1.000     | 0.996  | 0.998    | 0.809        | 0.727     | 0.923  | 0.814    |
| RF          | 0.998         | 1.000     | 0.996  | 0.998    | 0.809        | 0.742     | 0.907  | 0.817    |
| SVC         | 0.833         | 0.868     | 0.808  | 0.837    | 0.809        | 0.758     | 0.893  | 0.820    |
| MLP         | 0.833         | 0.982     | 0.754  | 0.853    | 0.774        | 0.864     | 0.770  | 0.814    |
| VQC         | 0.812         | 0.838     | 0.793  | 0.814    | 0.826        | 0.818     | 0.871  | 0.844    |

LR: losgistic regression, KNN: k-nearest neighbor, XGBoost: extreamm gradient boosting, RF: randomforest, SVC: support vector classifier, MLP: multi-layer perceptron, VQC: variational quantum circuit.

**Table S11.** Gender prediction performance of various machine learning classifiers.

| Classifiers | Train (N=231) |           |        |          | Test (N=57) |           |        |          |
|-------------|---------------|-----------|--------|----------|-------------|-----------|--------|----------|
|             | Accuracy      | Precision | Recall | F1-score | Accuracy    | Precision | Recall | F1-score |
| LR          | 0.797         | 0.772     | 0.907  | 0.789    | 0.772       | 0.719     | 0.852  | 0.780    |
| KNN         | 0.810         | 0.781     | 0.824  | 0.802    | 0.807       | 0.781     | 0.862  | 0.820    |
| XGBoost     | 1.000         | 1.000     | 1.000  | 1.000    | 0.737       | 0.688     | 0.815  | 0.746    |
| RF          | 1.000         | 1.000     | 1.000  | 1.000    | 0.754       | 0.688     | 0.846  | 0.759    |
| SVC         | 0.840         | 0.789     | 0.874  | 0.829    | 0.895       | 0.844     | 0.964  | 0.900    |
| MLP         | 0.857         | 0.833     | 0.872  | 0.852    | 0.860       | 0.781     | 0.962  | 0.862    |
| VQC         | 0.779         | 0.789     | 0.769  | 0.779    | 0.842       | 0.844     | 0.871  | 0.857    |

LR: losgistic regression, KNN: k-nearest neighbor, XGBoost: extreamm gradient boosting, RF: randomforest, SVC: support vector classifier, MLP: multi-layer perceptron, VQC: variational quantum circuit.

**Table S12.** Gender prediction performance of various machine learning classifiers.

| Classifiers | Train (N=115) |           |        |          | Test (N=28) |           |        |          |
|-------------|---------------|-----------|--------|----------|-------------|-----------|--------|----------|
|             | Accuracy      | Precision | Recall | F1-score | Accuracy    | Precision | Recall | F1-score |
| LR          | 0.852         | 0.879     | 0.836  | 0.857    | 0.857       | 0.846     | 0.846  | 0.846    |
| KNN         | 0.852         | 0.828     | 0.873  | 0.850    | 0.786       | 0.769     | 0.769  | 0.769    |
| XGBoost     | 1.000         | 1.000     | 1.000  | 1.000    | 0.679       | 0.692     | 0.643  | 0.667    |
| RF          | 1.000         | 1.000     | 1.000  | 1.000    | 0.786       | 0.769     | 0.769  | 0.769    |
| SVC         | 0.878         | 0.914     | 0.855  | 0.883    | 0.821       | 0.846     | 0.786  | 0.815    |
| MLP         | 0.809         | 0.983     | 0.731  | 0.838    | 0.786       | 0.923     | 0.706  | 0.800    |
| VQC         | 0.852         | 0.914     | 0.815  | 0.862    | 0.857       | 0.923     | 0.800  | 0.857    |

LR: losgistic regression, KNN: k-nearest neighbor, XGBoost: extreamm gradient boosting, RF: randomforest, SVC: support vector classifier, MLP: multi-layer perceptron, VQC: variational quantum circuit.

**Table S13.** Gender prediction performance of various machine learning classifiers.

| Classifiers | Train (N=57) |           |        |          | Test (N=14) |           |        |          |
|-------------|--------------|-----------|--------|----------|-------------|-----------|--------|----------|
|             | Accuracy     | Precision | Recall | F1-score | Accuracy    | Precision | Recall | F1-score |
| LR          | 0.930        | 0.949     | 0.949  | 0.949    | 0.643       | 0.714     | 0.625  | 0.667    |
| KNN         | 0.877        | 0.897     | 0.921  | 0.909    | 0.643       | 0.571     | 0.667  | 0.615    |
| XGBoost     | 1.000        | 1.000     | 1.000  | 1.000    | 0.571       | 0.571     | 0.571  | 0.571    |
| RF          | 1.000        | 1.000     | 1.000  | 1.000    | 0.643       | 0.714     | 0.625  | 0.667    |
| SVC         | 0.930        | 0.949     | 0.949  | 0.949    | 0.571       | 0.429     | 0.600  | 0.500    |
| MLP         | 0.877        | 0.974     | 0.864  | 0.916    | 0.786       | 1.000     | 0.700  | 0.824    |
| VQC         | 0.912        | 0.949     | 0.925  | 0.937    | 0.786       | 0.857     | 0.750  | 0.800    |

LR: losgistic regression, KNN: k-nearest neighbor, XGBoost: extreamm gradient boosting, RF: randomforest, SVC: support vector classifier, MLP: multi-layer perceptron, VQC: variational quantum circuit.
